# Supplementary material for: Biohybrid -Se-S- Coupling Reactions of an Amino Acid Derived Seleninate
Source: Molecules. 2013 Feb 4;18(2):1963–72. doi: 10.3390/molecules18021963 (PMC6270073; doi:10.3390/molecules18021963)

# Supplementary Materials

Figure S1. NMR Spectra for Compound 8.

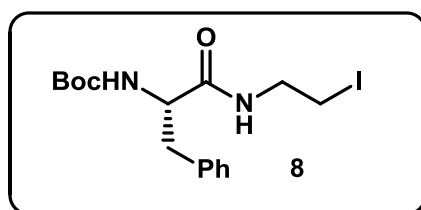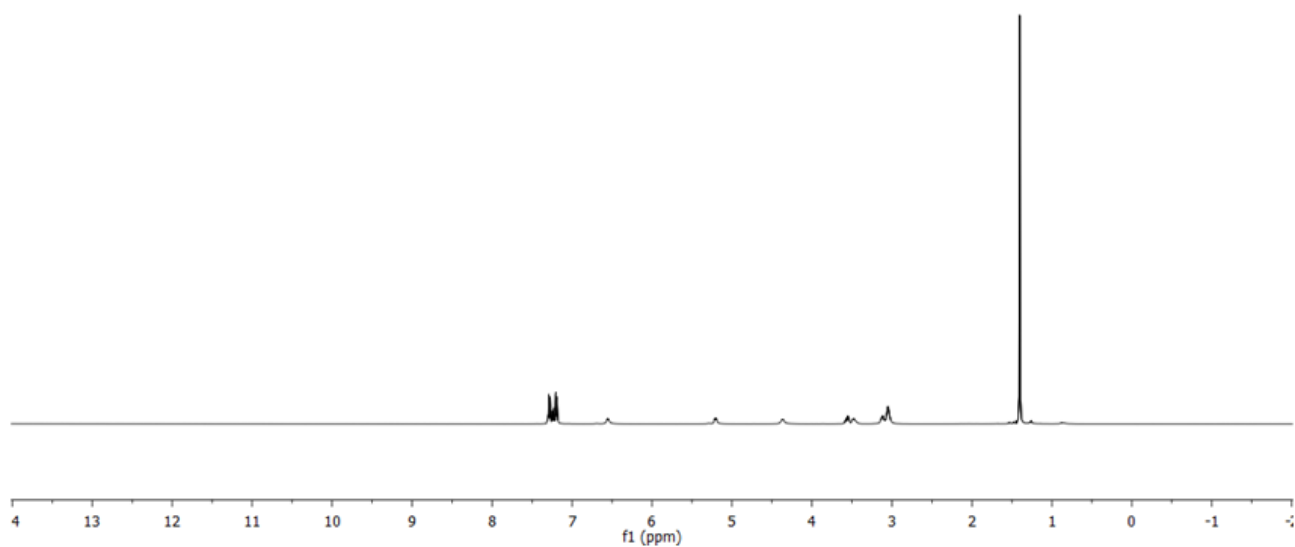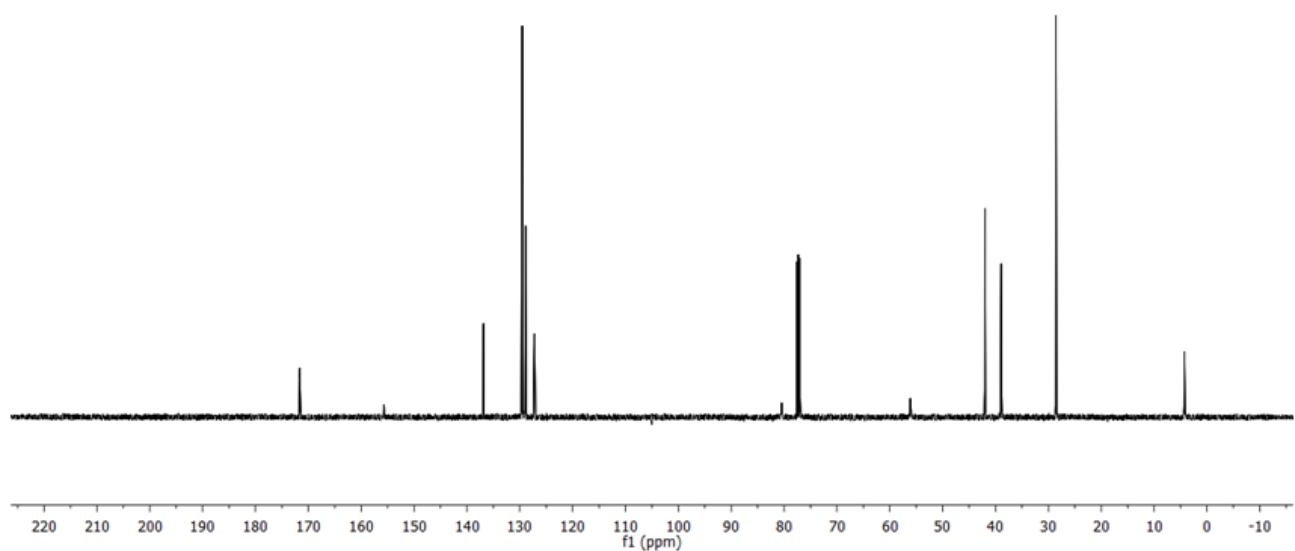

Figure S2. NMR Spectra for Compound 9.

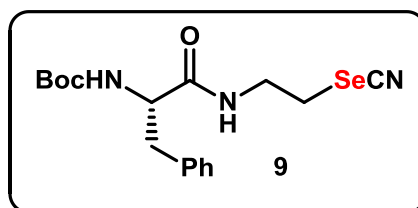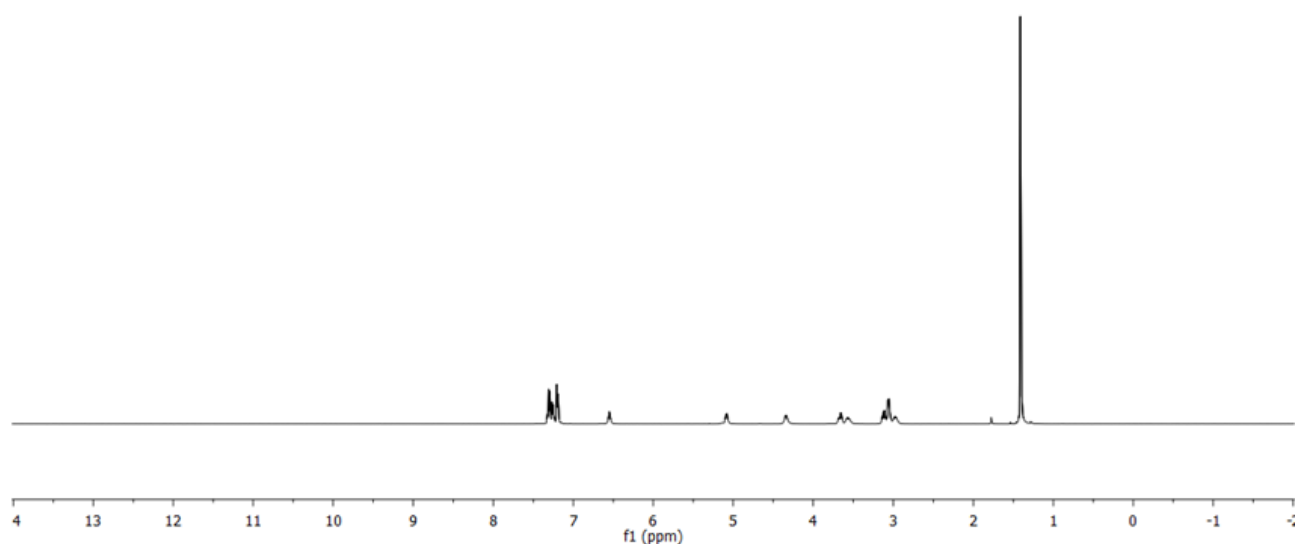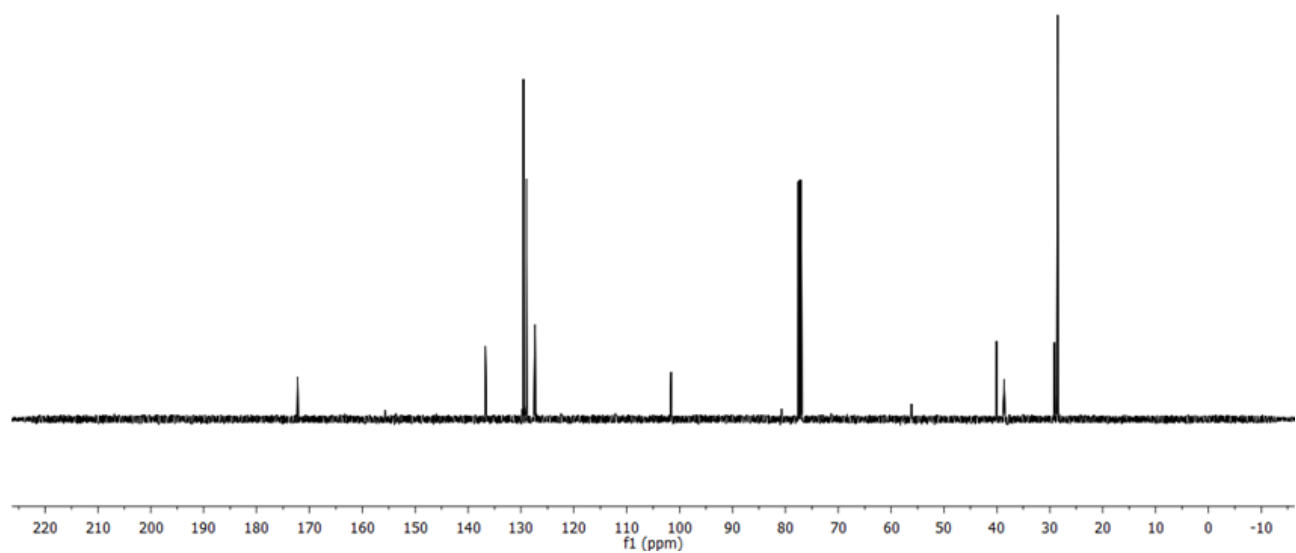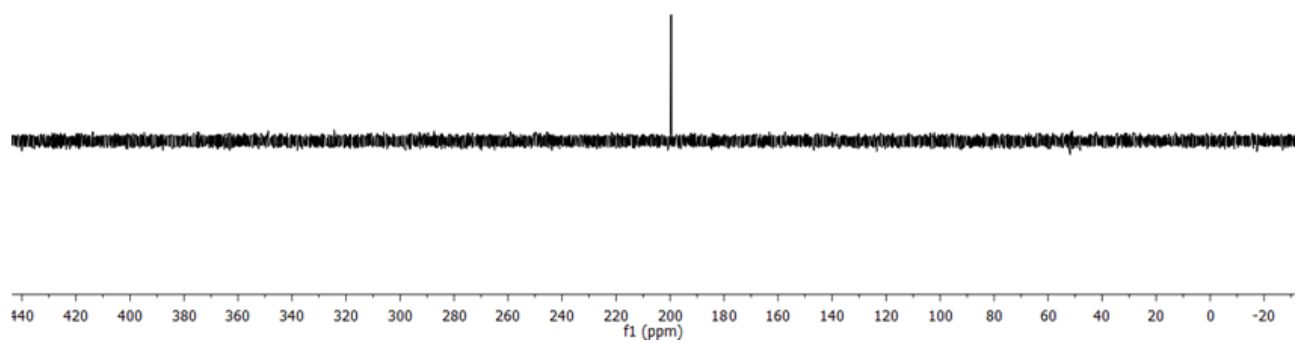

**Figure S3.** NMR Spectra for Compound **10**.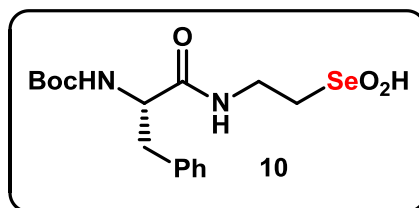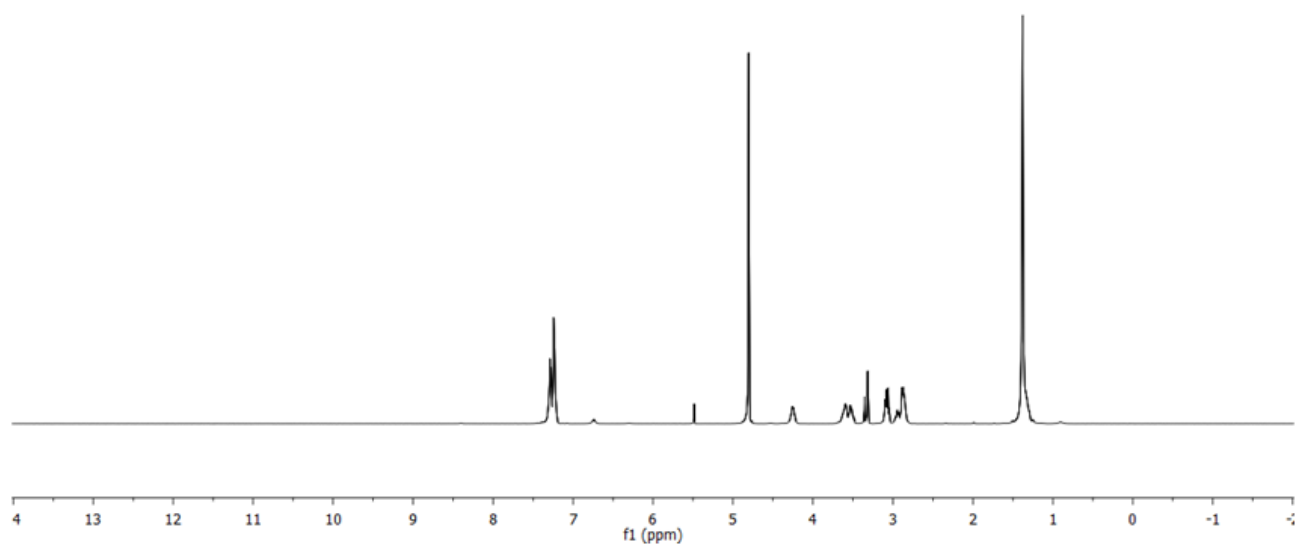<sup>13</sup>C-NMR of Compound **10** in CD<sub>3</sub>OD.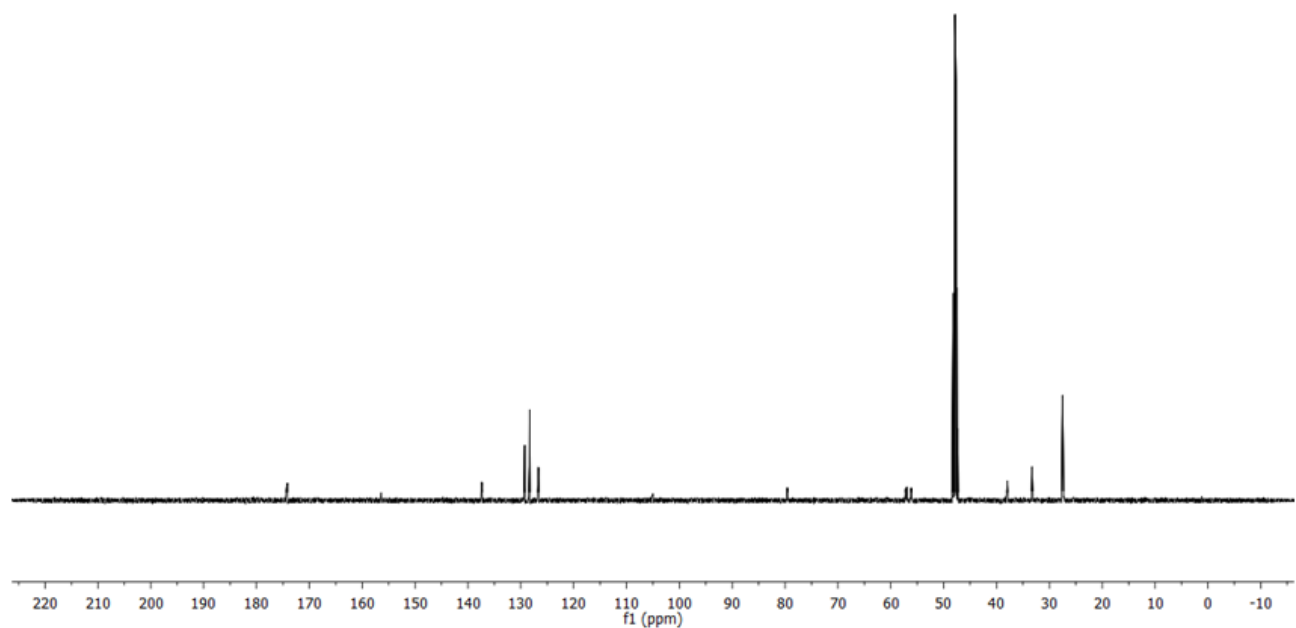

**Figure S3. Cont.**

$^{13}\text{C}$  NMR of Compound **10** in Acetone- $d_6$ .

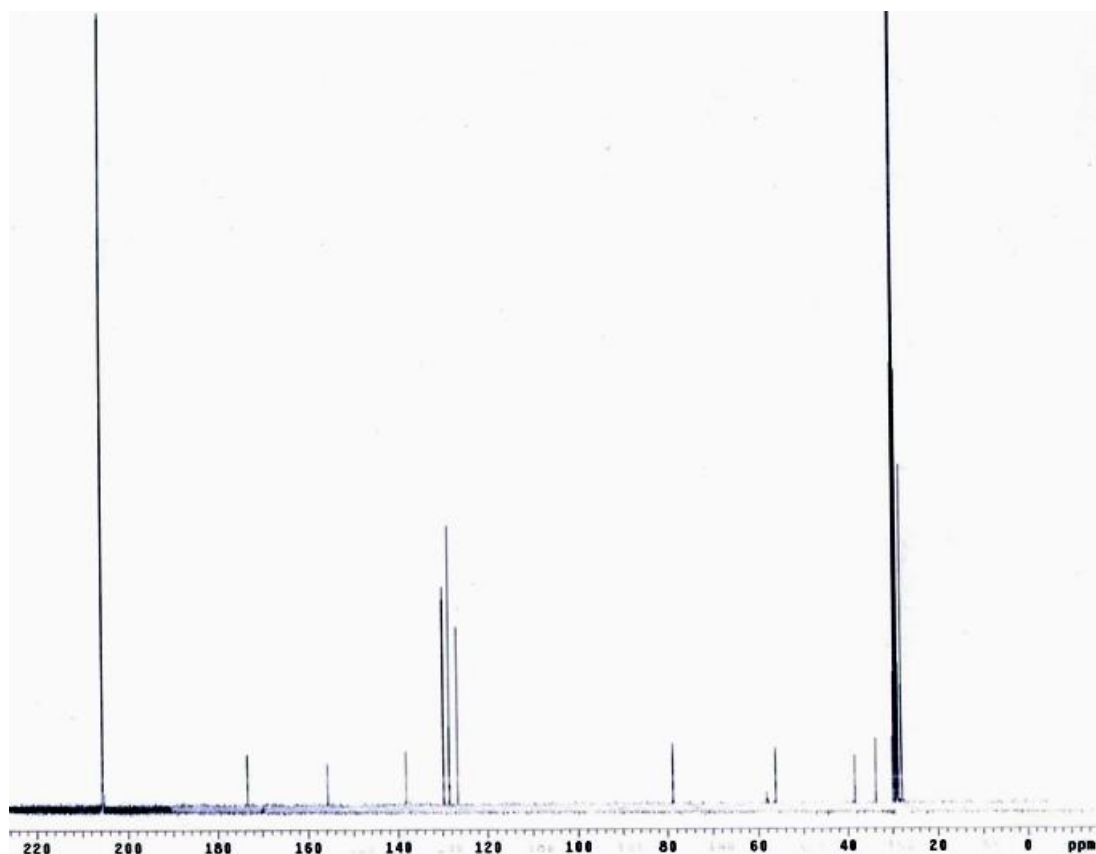

$^{13}\text{C}$ -NMR of Compound **10** in  $\text{CDCl}_3$ .

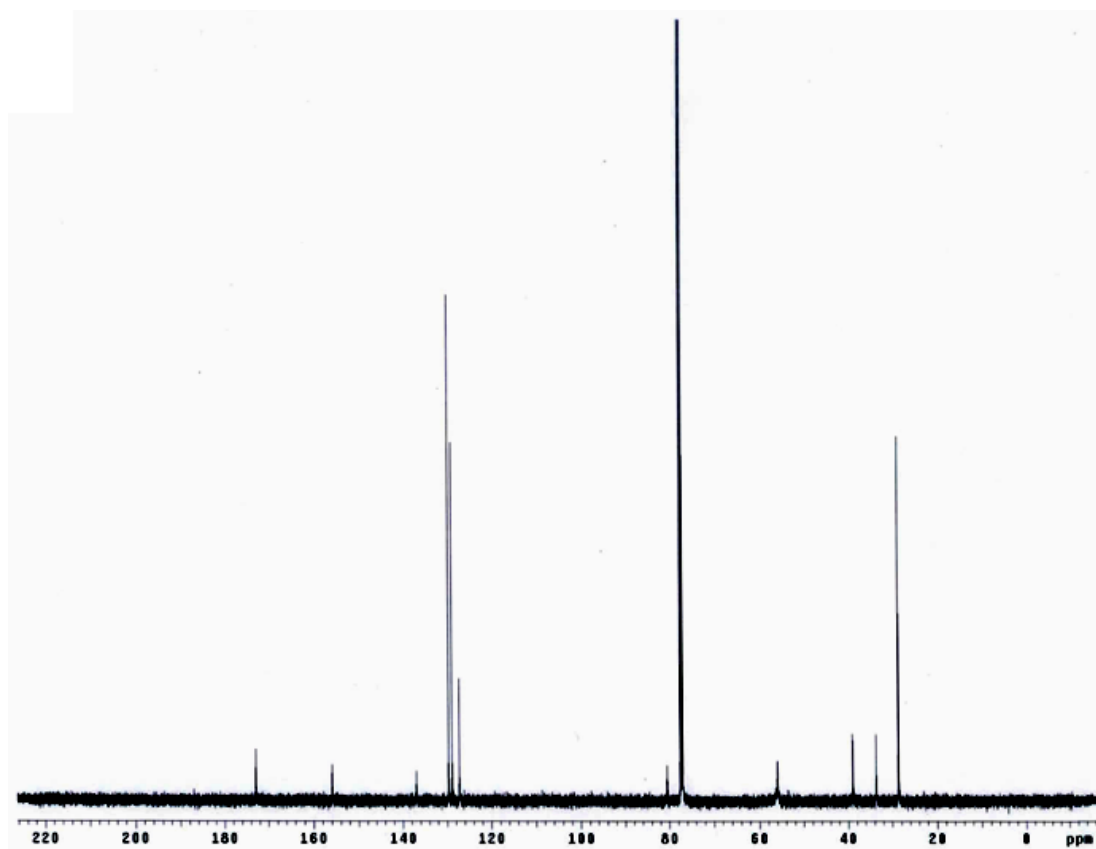

Figure S3. Cont.

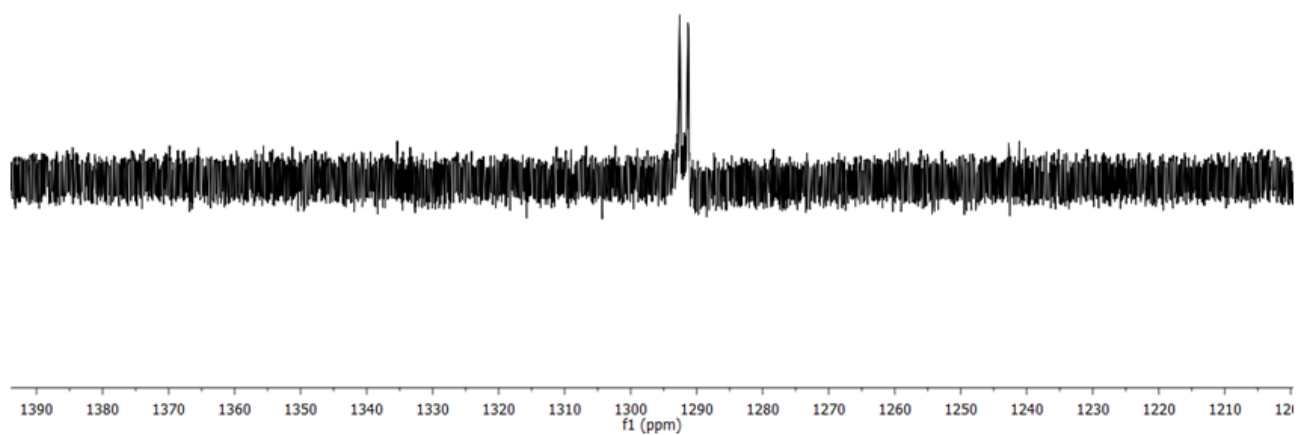

Figure S4. NMR Spectra for Compound 11.

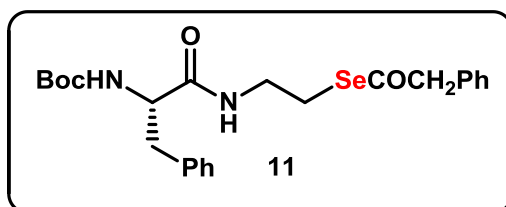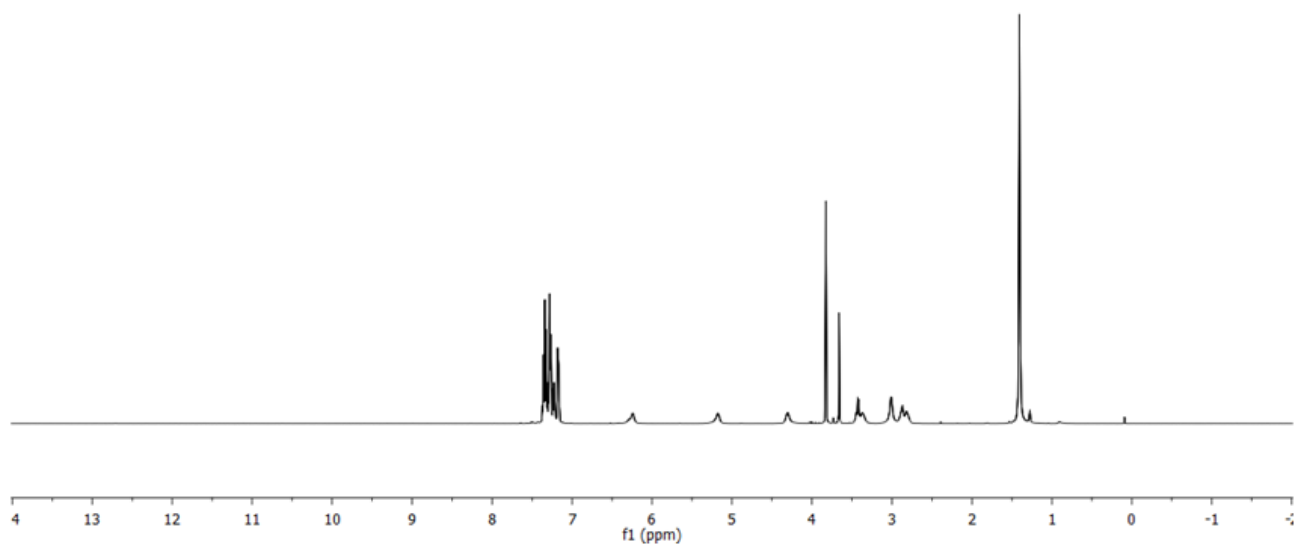

Figure S4. Cont.

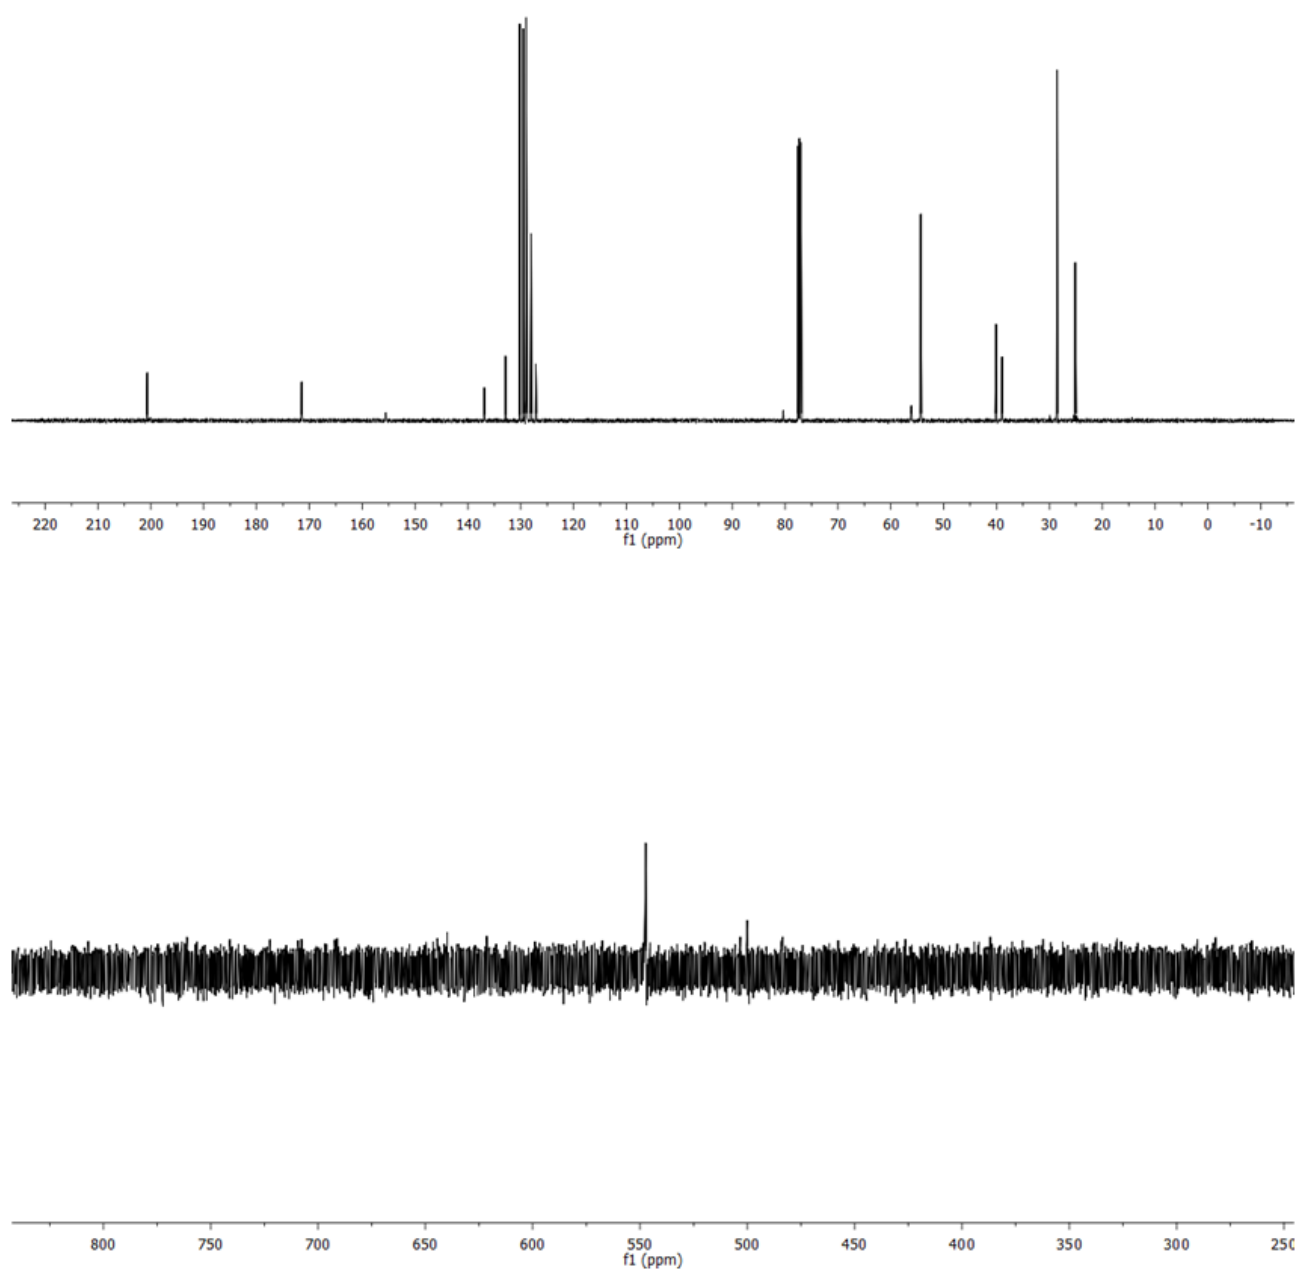

**Figure S5.** NMR Spectra for Compound **12**.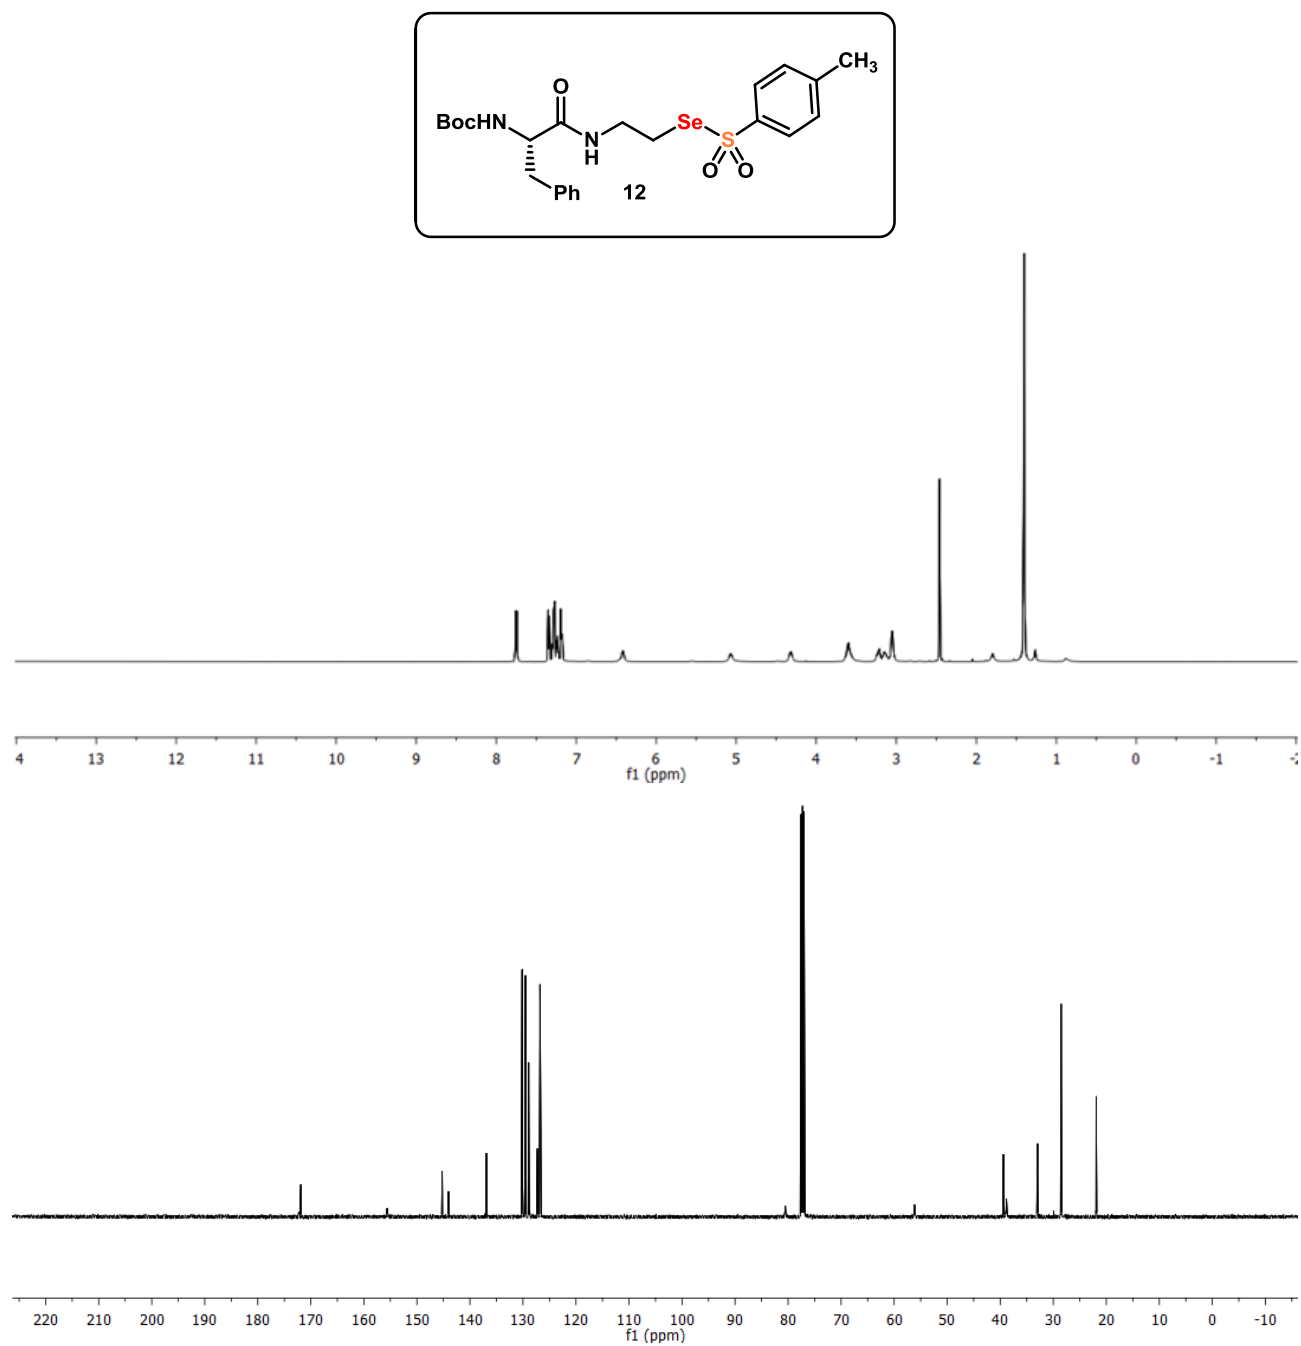

Figure S5. Cont.

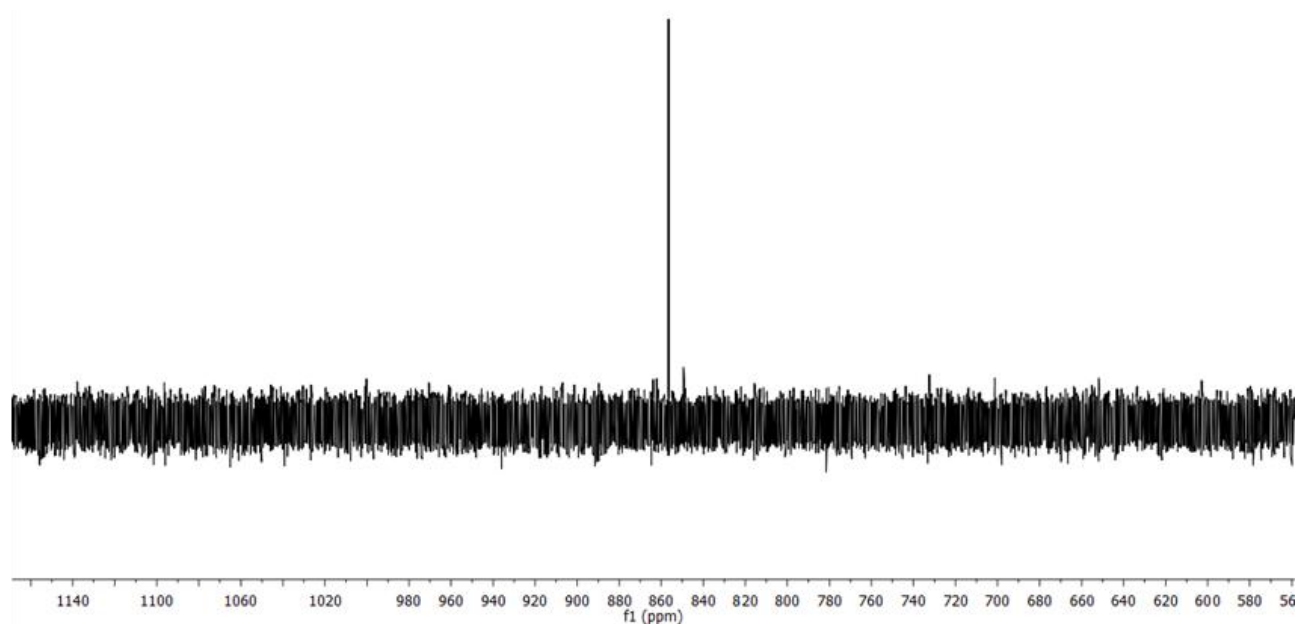

Figure S6. NMR Spectra for Compound 14.

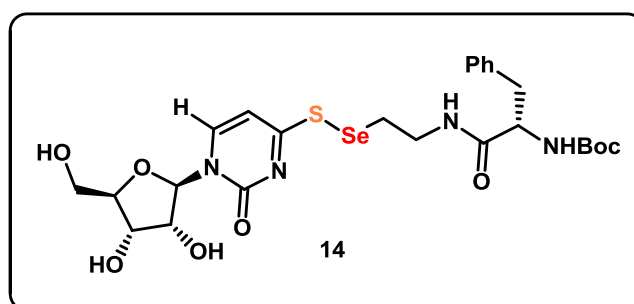

szx-3-205-1-methanol  
Std proton

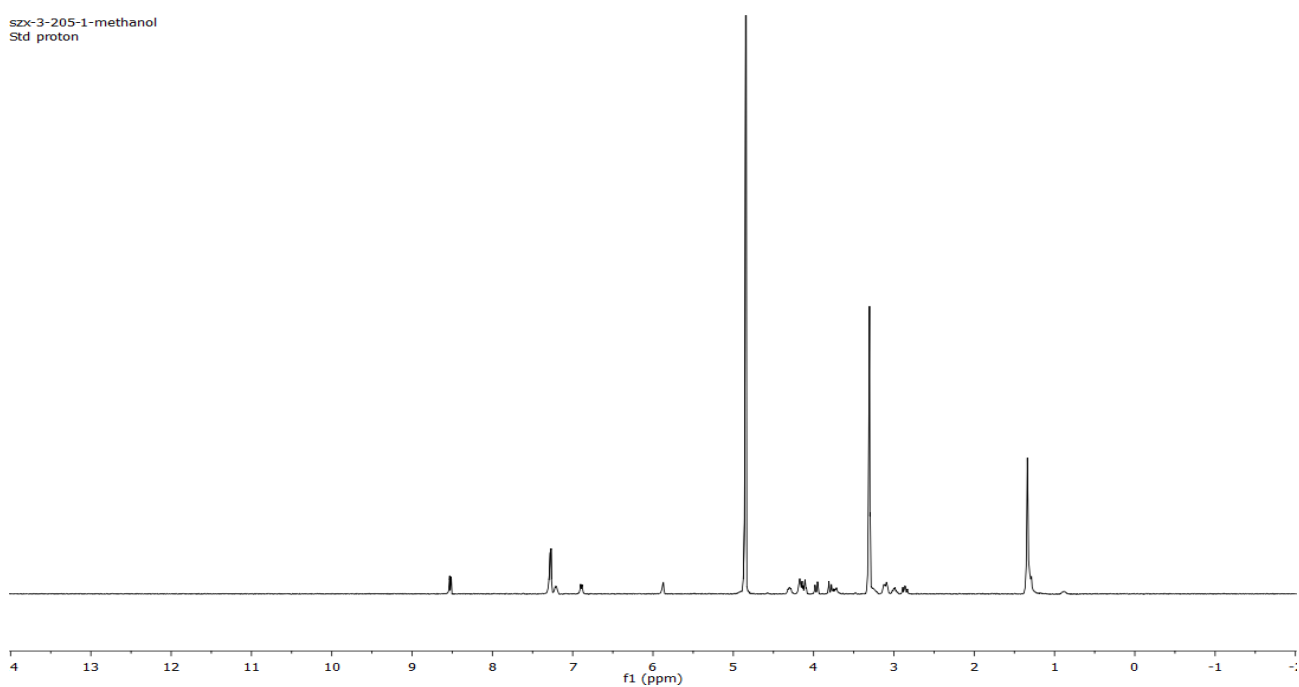

Figure S6. Cont.

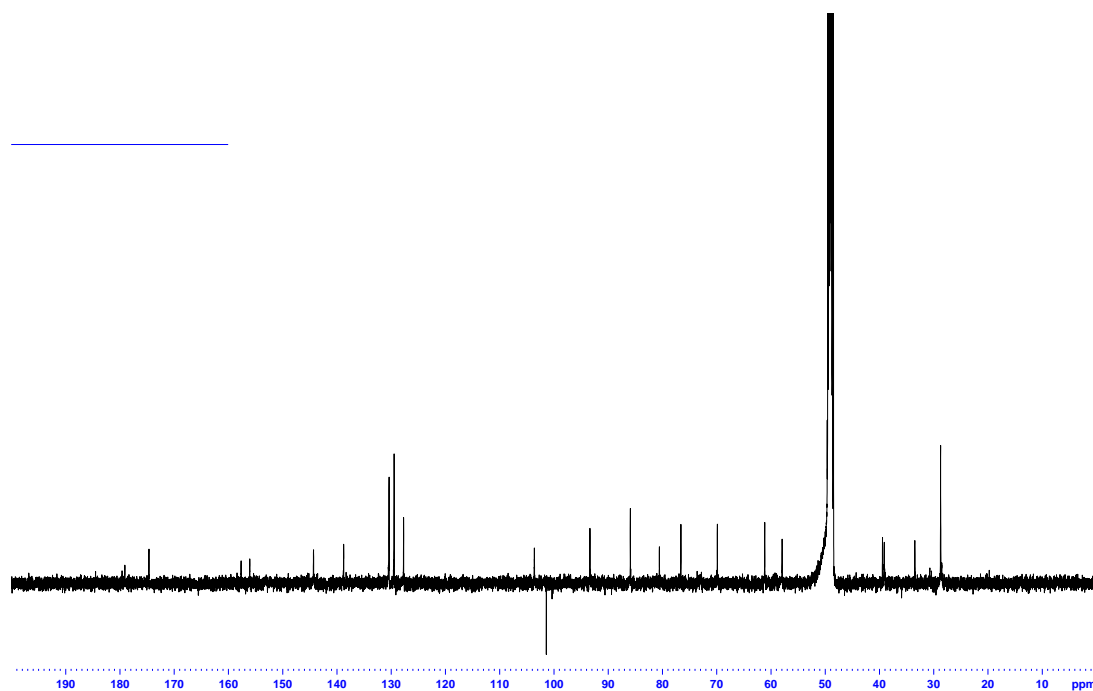

Figure S7. NMR Spectra for Compound 16.

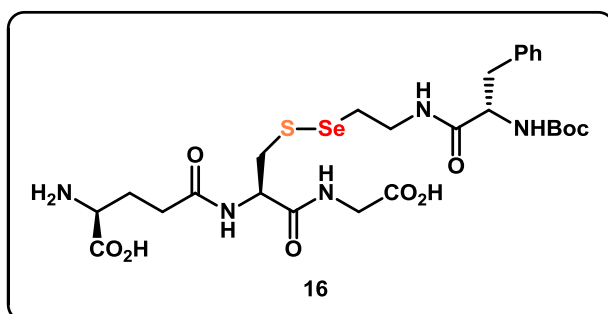

Chromatogram of Compound 16.

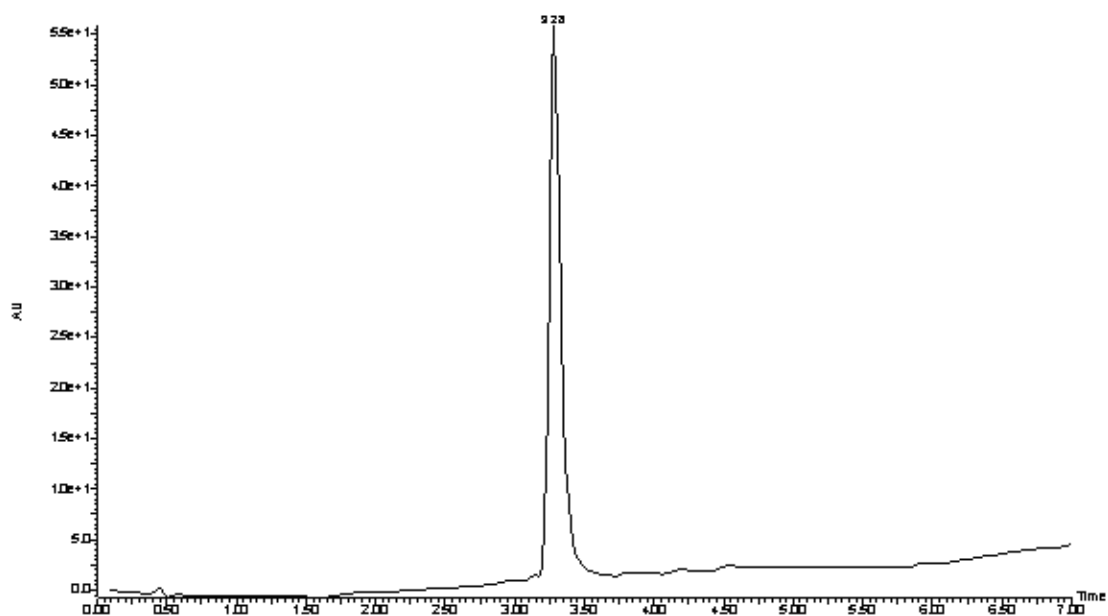

Figure S7. Cont.

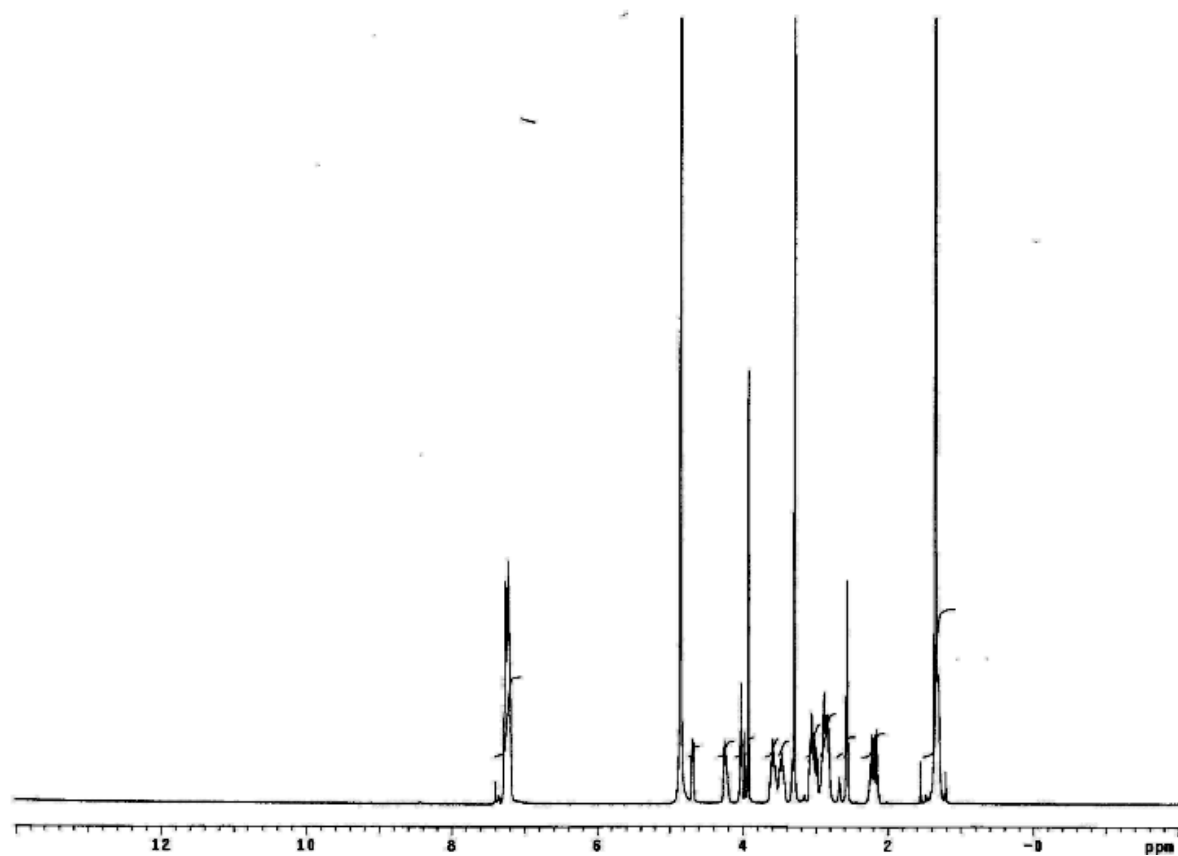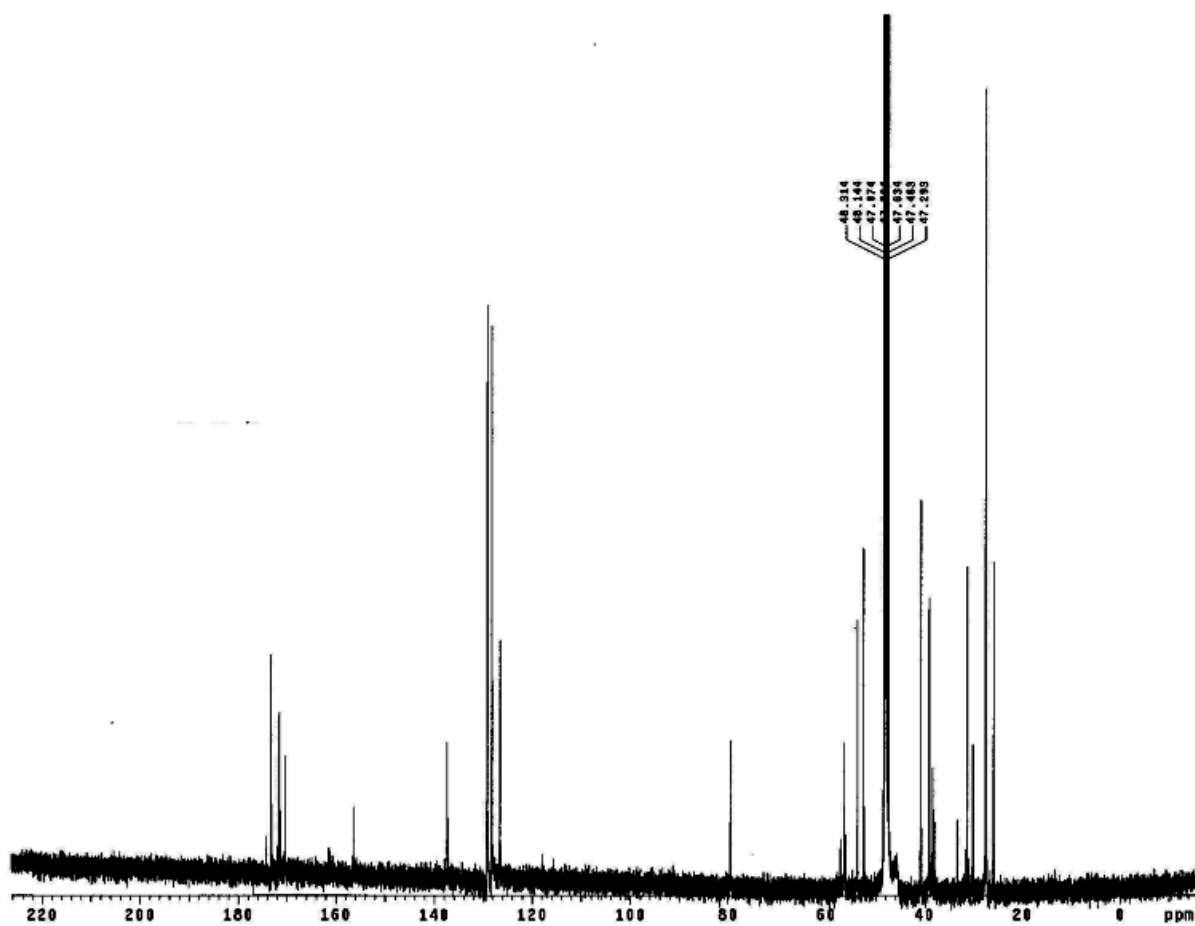

Supplement: Supplementary file 1 [file molecules-18-01963-s001.pdf]
